# Supplementary material for: Feature selection based on self-information and entropy measures for incomplete neighborhood decision systems
Source: Springer Nature journal article supplement (doi:10.1007/s40747-022-00882-8), 2022-10-11
Supplement: MOESM1 [file 23593536]

## 1 Supplementary File

*Proof of Property 1:* Obviously established.

*Proof of Property 2:*

(1) Because  $A1 \subseteq A2 \subseteq CA$ , we have  $NT_{A1}^\lambda(D_k) \subseteq NT_{A2}^\lambda(D_k)$ , thus we can obtain  $shar_{A1}(D_k) \leq shar_{A2}(D_k)$  from *Definition 7*.

(2) It is similar to (1).

*Proof of Property 3:* (1) Because  $A1 \subseteq A2$ , according to *Property 2(1)*, it follows that  $shar_{A1}(D_k) \leq shar_{A2}(D_k)$ . Then, we can obtain

$$\frac{shar_{A1}(D_k)}{dec(D_k)} \leq \frac{shar_{A2}(D_k)}{dec(D_k)}.$$

By *Definition 8* we have  $\theta_{A1}^{(1)}(D_k) \leq \theta_{A2}^{(1)}(D_k)$ .

(2) It follow from *Property 3(1)* that  $\theta_{A1}^{(1)}(D_k) \leq \theta_{A2}^{(1)}(D_k)$  for any  $A1 \subseteq A2$ , thus it can be easily obtained that  $1 - \theta_{A1}^{(1)}(D_k) \geq 1 - \theta_{A2}^{(1)}(D_k)$ . From *Definition 8*, we have  $\sigma_{A1}^{(1)}(D_k) \geq \sigma_{A2}^{(1)}(D_k)$ .

*Proof of Property 4:* It follows From *Property 3* that  $\theta_{A1}^{(1)}(D_k) \leq \theta_{A2}^{(1)}(D_k)$  for any  $A1 \subseteq A2$ . Then, we can have that  $0 \leq -\ln \theta_{A1}^{(1)}(D_k) \leq -\ln \theta_{A2}^{(1)}(D_k)$ ,  $0 \leq \sigma_{A1}^{(1)}(D_k) \leq \sigma_{A2}^{(1)}(D_k) \leq 1$ . Thus, we can obtain  $I_{A1}^1(D_k) \geq I_{A2}^1(D_k)$ .

*Proof of Property 5:* (1) For  $A1 \subseteq A2$ , it follows from *Property 2(2)* that  $blun_{A1}(D_k) \geq blun_{A2}(D_k)$ ,

therefore, we have  $\frac{dec(D_k)}{blun_{A1}(D_k)} \leq \frac{dec(D_k)}{blun_{A2}(D_k)}$ . From

*Definition 11*, we have  $\theta_{A1}^{(2)}(D_k) \leq \theta_{A2}^{(2)}(D_k)$ .

(2) From *Property 5(1)*, it can be follow that  $\theta_{A1}^{(2)}(D_k) \leq \theta_{A2}^{(2)}(D_k)$  for any  $A1 \subseteq A2$ . So we can know that  $1 - \theta_{A1}^{(2)}(D_k) \geq 1 - \theta_{A2}^{(2)}(D_k)$ . It can be easily proved that  $\sigma_{A1}^{(2)}(D_k) \geq \sigma_{A2}^{(2)}(D_k)$ .

*Proof of Property 6:* By *Property 5(1)*, we can know that  $\theta_{A1}^{(2)}(D_k) \leq \theta_{A2}^{(2)}(D_k)$ . Therefore, we can have that  $0 \leq -\ln \theta_{A1}^{(2)}(D_k) \leq -\ln \theta_{A2}^{(2)}(D_k)$ ,  $0 \leq \sigma_{A1}^{(2)}(D_k) \leq \sigma_{A2}^{(2)}(D_k) \leq 1$ . Then, we can obtain  $I_{A1}^2(D_k) \geq I_{A2}^2(D_k)$ .

*Proof of Property 7:* From *Properties 4* and *6*, we can obtain that  $I_{A1}^1(D_k) \geq I_{A2}^1(D_k)$  and  $I_{A1}^2(D_k) \geq I_{A2}^2(D_k)$  for any  $A1 \subseteq A2$ . Therefore, we can know that  $I_{A1}^1(D_k) + I_{A1}^2(D_k) \geq I_{A2}^1(D_k) + I_{A2}^2(D_k)$ . Hence,  $I_{A1}^3(D_k) \geq I_{A2}^3(D_k)$ .

*Proof of Property 8:* (1) For any  $A1 \subseteq A2$ , it follow  $shar_{A1}(D_k) \leq shar_{A2}(D_k)$  and  $blun_{A1}(D_k) \geq blun_{A2}(D_k)$ .

Therefore, it can be obtained  $\frac{shar_{A1}(D_k)}{blun_{A1}(D_k)} \leq \frac{shar_{A2}(D_k)}{blun_{A2}(D_k)}$ .

According to *Definition 16*, we can know that  $\theta_{A1}^{(3)}(D_k) \leq \theta_{A2}^{(3)}(D_k)$ . Then,  $1 - \theta_{A1}^{(3)}(D_k) \geq 1 - \theta_{A2}^{(3)}(D_k)$ . Hence, it can be obtained that  $\sigma_{A1}^{(3)}(D_k) \geq \sigma_{A2}^{(3)}(D_k)$ .

(2) From *Definition 8* and *Definition 11*, we have

$$\theta_A^{(1)}(D_k) = \frac{shar_A(D_k)}{dec(D_k)} \text{ and } \theta_A^{(2)}(D_k) = \frac{dec(D_k)}{blun_A(D_k)}.$$

$$\begin{aligned} \text{Then, } \theta_A^{(1)}(D_k) \cdot \theta_A^{(2)}(D_k) &= \frac{shar_A(D_k)}{dec(D_k)} \cdot \frac{dec(D_k)}{blun_A(D_k)} = \\ &= \frac{shar_A(D_k)}{blun_A(D_k)}. \text{ From } \textit{Definition 16}, \text{ we can obtain } \theta_A^{(3)}(D_k) = \\ &= \frac{shar_A(D_k)}{blun_A(D_k)}, \text{ thus, } \theta_A^{(3)}(D_k) = \theta_A^{(1)}(D_k) \cdot \theta_A^{(2)}(D_k). \end{aligned}$$

$$\begin{aligned} \sigma_A^{(3)}(D_k) &= 1 - \theta_A^{(3)}(D_k) \\ &= 1 - \theta_A^{(1)}(D_k) \cdot \theta_A^{(2)}(D_k) \\ &= 1 - \left[1 - \sigma_A^{(1)}(D_k)\right] \cdot \left[1 - \sigma_A^{(2)}(D_k)\right] \\ &= \sigma_A^{(1)}(D_k) + \sigma_A^{(2)}(D_k) - \sigma_A^{(1)}(D_k) \cdot \sigma_A^{(2)}(D_k) \end{aligned}$$

*Proof of Property 9:* Suppose any  $A1 \subseteq A2$ , according to *Property 8(1)*, it follows that  $\theta_{A1}^{(3)}(D_k) \leq \theta_{A2}^{(3)}(D_k)$ . Therefore, one has  $0 \leq -\ln \theta_{A2}^{(3)}(D_k) \leq -\ln \theta_{A1}^{(3)}(D_k)$ ,  $0 \leq \sigma_{A2}^{(3)}(D_k) \leq \sigma_{A1}^{(3)}(D_k) \leq 1$ . From *Definition 17*,  $I_{A1}^4(D_k) \geq I_{A2}^4(D_k)$  can be hold.

*Proof of Property 10:*

$$\begin{aligned} I_A^{(4)}(D_k) &= -\sigma_A^{(3)}(D_k) \ln \theta_A^{(3)}(D_k) \\ &= -\left[\sigma_A^{(1)}(D_k) + \sigma_A^{(2)}(D_k) - \sigma_A^{(1)}(D_k) \cdot \sigma_A^{(2)}(D_k)\right] \\ &\quad \cdot \ln \left[\theta_A^{(1)}(D_k) + \theta_A^{(2)}(D_k)\right] \\ &= -\left[\sigma_A^{(1)}(D_k) + \sigma_A^{(2)}(D_k) - \sigma_A^{(1)}(D_k) \cdot \sigma_A^{(2)}(D_k)\right] \\ &\quad \cdot \left[\ln \theta_A^{(1)}(D_k) + \ln \theta_A^{(2)}(D_k)\right] \\ &= -\sigma_A^{(1)}(D_k) \cdot \ln \theta_A^{(1)}(D_k) - \sigma_A^{(2)}(D_k) \cdot \ln \theta_A^{(2)}(D_k) \\ &\quad + \left[\sigma_A^{(1)}(D_k) - 1\right] \cdot \sigma_A^{(2)}(D_k) \cdot \ln \theta_A^{(1)}(D_k) \\ &\quad + \left[\sigma_A^{(2)}(D_k) - 1\right] \cdot \sigma_A^{(1)}(D_k) \cdot \ln \theta_A^{(2)}(D_k) \\ &= I_A^1(D_k) + I_A^2(D_k) + \left[\sigma_A^{(1)}(D_k) - 1\right] \cdot \sigma_A^{(2)}(D_k) \\ &\quad \cdot \ln \theta_A^{(1)}(D_k) + \left[\sigma_A^{(2)}(D_k) - 1\right] \cdot \sigma_A^{(1)}(D_k) \cdot \ln \theta_A^{(2)}(D_k) \end{aligned}$$

From *Definition 8*, it follows that  $0 \leq \theta_A^{(1)}(D_k), \sigma_A^{(1)}(D_k) \leq 1$ , then, we have  $\ln \theta_A^{(1)}(D_k) \leq 0$ ,  $\sigma_A^{(1)}(D_k) - 1 \leq 0$ . In the same way,  $0 \leq \theta_A^{(2)}(D_k) \leq 1$  and  $0 \leq \sigma_A^{(2)}(D_k) \leq 1$  can be obtained from *Definition 11*, then it follows that  $\ln \theta_A^{(2)}(D_k) \leq 0$ ,  $\sigma_A^{(2)}(D_k) - 1 \leq 0$ . Hence, it can be proved that:

$$\begin{cases} \left[\sigma_A^{(1)}(D_k) - 1\right] \cdot \sigma_A^{(2)}(D_k) \cdot \ln \theta_A^{(1)}(D_k) \geq 0 & \textcircled{1} \\ \left[\sigma_A^{(2)}(D_k) - 1\right] \cdot \sigma_A^{(1)}(D_k) \cdot \ln \theta_A^{(2)}(D_k) \geq 0 & \textcircled{2} \end{cases}$$

Therefore,  $\varphi = \textcircled{1} + \textcircled{2} \geq 0$ .

$$\begin{aligned} I_A^4(D_k) &= I_A^1(D_k) + I_A^2(D_k) + \varphi \\ &= I_A^3(D_k) + \varphi \\ &\geq I_A^3(D_k) \end{aligned}$$

*Proof of Property 11:* It is straightforward from *Property 9*.
